# Supplementary material for: Comment on “Thermal infrared observations of a western United States biomass burning aerosol plume” by Sorenson et al. (2024)
Source: Copernicus journal article supplement (doi:10.5194/acp-26-515-2026), 2026-01-09
Supplement: Supplementary file [file acp-26-515-2026-supplement-title-page.pdf › acp-26-515-2026-supplement-title-page.pdf]

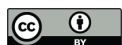

## *Supplement of*

# **Comment on “Thermal infrared observations of a western United States biomass burning aerosol plume” by Sorenson et al. (2024)**

**Michael D. Fromm**

*Correspondence to:* Michael D. Fromm ([michael.d.fromm4.civ@us.navy.mil](mailto:michael.d.fromm4.civ@us.navy.mil))

- [acp-26-515-2026-supplement-title-page.pdf](#)
- [comment\\_s24\\_supplement\\_v1\\_submit.pdf](#)
- [movieS01.gif](#)
- [movieS02.gif](#)
- [movieS03.gif](#)
- [movieS04.gif](#)
- [movieS05.gif](#)
- [movieS06.gif](#)
- [movieS07.gif](#)
- [movieS08.gif](#)
- [movieS09.gif](#)
- [movieS10.gif](#)

The copyright of individual parts of the supplement might differ from the article licence.
